# Supplementary material for: Lysine demethylase KDM2A inhibits TET2 to promote DNA methylation and silencing of tumor suppressor genes in breast cancer
Source: PubMed Central journal article supplement (PMC5608919; doi:10.1038/oncsis.2017.71), 2017-08-07
Supplement: oncsis201771x1.pdf [file oncsis201771x1.pdf]

**Supplementary Table 1.** The sequence of the primers used in this study

---

**RT-PCR**

---

|               |                              |
|---------------|------------------------------|
| TET1-Forward  | 5'-CCTTTGGGAACCGACTCCTC-3'   |
| TET1-Reverse  | 5'-CACAAAGGTTTTGGTCGCTGG-3'  |
| TET2-Forward  | 5'-CTCGCATGCAAGTCACGTCC-3'   |
| TET2-Reverse  | 5'-ATGTTTGCCAGCCTCGTTCT-3'   |
| TET3-Forward  | 5'-ACCTGCCAGGCCTTTATGAC-3'   |
| TET3-Reverse  | 5'-CCAGCCTTTATTTCCACCTCCT-3' |
| EpCAM-Forward | 5'-TTGCTCAAAGCTGGCTGCCA-3'   |
| EpCAM-Reverse | 5'-GGATCCAGTTGATAACGCGT-3'   |

---

**ChIP primer**

---

|                          |                              |
|--------------------------|------------------------------|
| TET2-ChIP-Fowrward       | 5'-GGGCTCTTACGAGAGGCAAC-3'   |
| TET2-ChIP-Reverse        | 5'-CGGCCACCTTCTGTTTACT-3'    |
| EpCAM-ChIP-Forward       | 5'- GGATTGGAGCAGAGTTGTG-3'   |
| EpCAM-ChIP-Reverse       | 5'- AAGGCCATTTCCCTACCAAG-3'  |
| TET2-ChIP p65-1- Forward | 5'- CTTCTTAGCAACAATGCGACA-3' |
| TET2-ChIP p65-1- Reverse | 5'- TATGGGATCACTGCATGGTG-3'  |
| TET2-ChIP p65-2- Forward | 5'- CACCATGCAGTGATCCCATA-3'  |
| TET2-ChIP p65-2- Reverse | 5'- TTCCCCTTCTAATGCTCCT-3'   |
| TET2-ChIP p65-3- Forward | 5'- TGGGCTTTGTTCTTCATCTCA-3' |
| TET2-ChIP p65-3- Reverse | 5'- GAAACCGACCGATAACAGAGC-3' |
| TET2-ChIP p65-4- Forward | 5'- TCAGGGAAAATCAAGCATCC-3'  |
| TET2-ChIP p65-4- Reverse | 5'- ACCCCCTACTTCTCGCTAGG-3'  |

---
